1 **Alterations in gut microbiome composition and function in irritable bowel syndrome and**  
2 **increased probiotic abundance with daily supplementation**

3

4 Joann Phan<sup>1</sup>, Divya Nair<sup>1</sup>, Suneer Jain<sup>1</sup>, Thibaut Montagne<sup>1</sup>, Demi Valeria Flores<sup>1</sup>, Andre Nguyen<sup>1</sup>,  
5 Summer Dietsche<sup>1</sup>, Saurabh Gombhar<sup>2</sup>, Philip Cotter<sup>3</sup>

6

7 **Affiliations**

8

9 1. Sun Genomics, Inc., San Diego, CA, USA

10 2. Atropos Health, Palo Alto, CA, USA

11 3. ResearchDx, Inc., Irvine, CA, USA

12

13 **Corresponding Author:** Joann Phan

14 **Email:** joann [at] sungenomics.com

15

16 **Keywords:** irritable bowel syndrome, gut microbiome, metagenomics, probiotics

17

18 **This PDF file includes:** Main text, Figures 1-3, Tables 1 and S1

19

20 **Abstract**

21

22 **Background.** Irritable bowel syndrome (IBS) is characterized by abdominal discomfort and irregular  
23 bowel movements and stool consistency. Because there are different symptoms associated with IBS, it is  
24 difficult to diagnose the role of the microbiome in IBS. **Objective.** Here, we present a study that includes  
25 metagenomic sequencing of stool samples from subjects with the predominant subtypes of IBS and a  
26 healthy cohort. We collected longitudinal samples from individuals with IBS who took daily made-to-order  
27 precision probiotic and prebiotic supplementation throughout the study. **Materials and Methods.** This  
28 study includes a population of 489 individuals with IBS and 122 healthy controls. All stool samples were  
29 subjected to shotgun metagenomic sequencing. Precision probiotics and prebiotics were formulated for  
30 all subjects with longitudinal timepoints. **Results.** There was significant variation explained in the  
31 microbiome between the healthy and IBS cohorts. Individuals with IBS had a lower gut microbiome  
32 diversity and reduced anti-inflammatory microbes compared to the healthy controls. *Eubacterium rectale*  
33 and *Faecalibacterium prausnitzii* were associated with healthy microbiomes while *Shigella* species were  
34 associated with IBS. Pathway analysis indicated a functional imbalance of short chain fatty acids,  
35 vitamins, and a microbial component of Gram-negative bacteria in IBS compared to healthy controls. In  
36 the longitudinal dataset, there was a significant difference in microbiome composition between timepoints  
37 1 and 3. There was also a significant increase in the overall microbiome score and relative abundances of

38 probiotic species used to target the symptoms associated with IBS. **Conclusions.** We identified microbes  
39 and pathways that differentiate healthy and IBS microbiomes. In response to precision probiotic  
40 supplementation, we identified a significant improvement in the overall microbiome score in individuals  
41 with IBS. These results suggest an important role for probiotics in managing IBS symptoms and  
42 modulation of the microbiome as a potential management strategy.

43

#### 44 **Importance**

45

46 An estimated 35 million people in the United States and 11.5% of the population globally are affected by  
47 IBS. Immunity, genetics, environment, diet, small intestinal bacterial overgrowth (SIBO), and the gut  
48 microbiome are all factors that contribute to the onset or triggers of IBS. With strong supporting evidence  
49 that the gut microbiome may influence symptoms associated with IBS, elucidating the important microbes  
50 that contribute to the symptoms and severity is important to make decisions for targeted treatment. As  
51 probiotics have become more common in treating IBS symptoms, identifying effective probiotics may help  
52 inform future studies and treatment.

53

#### 54 **Introduction**

55

56 Irritable bowel syndrome (IBS) is characterized by chronic gastrointestinal discomfort and abdominal  
57 pain with changes in bowel habits or stool consistency. IBS affects approximately 11.5% of the  
58 population, depending on the country or region (1). Because of the high prevalence of IBS, symptoms  
59 contribute to changes in quality of life and increases in healthcare and economic burden (2–5). There are  
60 four subtypes based on the symptoms people experience, IBS-C (constipation), IBS-D (diarrhea), IBS-A  
61 (alternating), or unspecified (6). Individuals with IBS-A experience alternating symptoms of chronic  
62 diarrhea and constipation. The criterion for diagnosis is symptom based and codified in the Rome IV  
63 criteria; there is not yet consensus on the underlying etiology of IBS (7, 8). In addition, there are different  
64 factors that contribute to the varying symptoms of IBS, including diet, immune response, host genetics,  
65 environmental stress, gut microbiome composition, and dysbiosis (9, 10).

66

67 Currently, the role of the gut microbiome in individuals with IBS remains poorly understood. A  
68 “healthy” gut microbiome may be undefined, but there are microorganisms associated with an unhealthy  
69 microbiome, including microorganisms that induce inflammation or dysbiosis that contribute to the  
70 symptoms associated with IBS. Changes in microbiome composition also impact the microbiome’s  
71 functional potential and metabolism, which may in turn affect host physiology. For example, studies  
72 indicate individuals experiencing IBS-C show microbiome signatures such as increased *Pseudomonas*  
73 and *Bacteroides thetaiotamicron* with depletion of *Paraprevotella*, significant associations with  
74 *Fusobacterium nucleatum* and *Meganomoas hypermegale*, and pathways of sugar and amino acid

75 metabolism (11). In addition, research has characterized the microbiome of subjects with IBS-C with the  
76 biosynthetic pathways for sugar and amino acid metabolism, subjects with IBS-D had microbes that  
77 predominated the pathways for nucleotides and fatty acids acid synthesis. (11). Amplicon studies have  
78 also described an enrichment of Clostridiales, *Prevotella*, and Enterobacteriaceae, reduced microbial  
79 richness, and the presence of methanogens in IBS (12, 13). However, amplicon studies can be subject to  
80 amplification bias, yielding variable results and do not resolve species-level taxonomic classification.  
81 Alternatively, several studies limited by sample size and methodology have not shown a difference  
82 between a healthy cohort and individuals with IBS (14).

83  
84 Because of the differences in IBS symptoms people experience and the individual nature of the  
85 syndrome, there is no standardized treatment or dietary recommendations to alleviate IBS symptoms  
86 (15). The antibiotic rifaximin has been shown to be an effective treatment for IBS-D (16, 17). However,  
87 rifaximin is ineffective for all IBS subtypes and antibiotic usage may be associated with an increased risk  
88 for IBS (18–21). There are additional options for treatment, including pharmaceutical options and fecal  
89 transplants, but these options are not always feasible and can be invasive. The administration of live  
90 microbial organisms, in the form of probiotics, has gained popularity with patients to alleviate their  
91 symptoms. Probiotics can alter the microbiome of patients with and without IBS (22, 23), depending on  
92 their endogenous microbiomes (24). Microbes not present in the current gut microbiome can also be re-  
93 established through probiotic supplementation (24). In individuals with IBS, there is correlative depletion  
94 of *Bifidobacterium* and *Lactobacillus* (8). Therefore, re-introducing probiotics into the gut microbiomes of  
95 individuals with IBS may lead to phenotypic changes. Clinical trials have demonstrated the reduction of  
96 symptoms associated with IBS with probiotic supplementation. Further studies have shown that in  
97 subjects with IBS-D and treated with *Bifidobacterium longum*, *B. bifidum*, *B. lactis*, *B.*  
98 *infantis*, and *Lactobacillus acidophilus*, there is a change in inflammation-related metabolites (25).  
99 Individuals with IBS on a gluten-free diet with probiotic supplementation of *Lactobacillus* and  
100 *Bifidobacterium spp.* saw an overall improvement in symptoms (26). Probiotic supplementation has also  
101 reduced stomach pain and improved stool consistency in individuals with IBS (27, 28).

102  
103 Here, we present a large-scale metagenomic study to characterize and compare the microbiome  
104 composition and functional potential of healthy controls and individuals with IBS. In addition, we collected  
105 longitudinal timepoints from individuals with IBS on daily prebiotic and probiotic supplementation. Our  
106 primary goals were to 1) identify metagenomic signatures associated with IBS and 2) investigate the  
107 microbiome effects of precision prebiotics and probiotics on individuals with IBS. Each made-to-order  
108 formulation includes 4-8 probiotic strains and 1-3 prebiotics, each at different concentrations from a  
109 biobank of over 100 possible ingredients supported by the clinical literature. Whole genome shotgun  
110 sequencing allows for species-level resolution and identification of functional potential. This method  
111 reduces amplification bias and allows for sequence-based mapping of pathways rather than functional

112 prediction based on amplicon-based taxonomic classification. We also investigate whether traditional  
113 tools in gross microbiome analysis can determine changes to the microbiome after probiotic  
114 supplementation. We hypothesized that metagenomic features distinguish healthy vs. IBS microbiome  
115 subtypes and that daily probiotic supplementation modulates the microbiomes of the individuals with IBS.

116

## 117 **Results**

118

### 119 *IBS and healthy subject demographics*

120

121 We included a total of 611 subjects in this study. Subjects without reported comorbidities and self-  
122 reported as healthy were included as the healthy control population. There were 489 subjects with IBS  
123 and 122 subjects in the healthy control population (Table 1). In addition, longitudinal samples from people  
124 with IBS were assessed to identify specific microbiome changes during the course of prebiotic and  
125 probiotic supplementation. These healthy and IBS subjects were also assigned an internal health index  
126 score for their initial microbiome profile and subsequent timepoints. The rationally designed and  
127 scientifically backed probiotics were part of a daily regimen for all subjects. Longitudinal timepoints were  
128 approximately 4 months apart. Of the 489 IBS subject population, 134 subjects had at least 2 timepoints,  
129 56 subjects had 3 timepoints, 28 subjects with 4 timepoints, 15 subjects with 5 timepoints, 5 subjects with  
130 6 timepoints, and 1 subject with 7 timepoints.

131

### 132 *Reduced microbial diversity and microbial signatures associated with IBS*

133

134 First, to compare the microbial community composition between the IBS and healthy control  
135 populations, a principal coordinates analysis was performed to visualize the beta diversity between the  
136 two cohorts (Figure 1). All healthy control microbiome samples clustered tightly together, while there was  
137 a spread of IBS samples that clustered around and away from the healthy control microbiome samples.  
138 The differences in phenotypes were identified with increased relative abundances of Enterobacterales  
139 species and reduction in *Eubacterium rectale* and *Faecalibacterium prausnitzii* (Figure 1). A subset of  
140 microbes that distinguish healthy and IBS were determined by random forest and were plotted along the  
141 second principal coordinate axis to show the spread of sample clustering between the healthy and IBS  
142 microbiomes. Next, when calculating alpha diversity metrics, there was a significant reduction in the  
143 Shannon index, richness, and evenness in IBS subtypes compared to the healthy control population  
144 (Figure 1).

145

146 Based on whole-genome shotgun metagenomic sequencing, microbial signatures distinguish the  
147 healthy control and IBS populations. Using a permuted multivariate analysis of variance, we calculated  
148 a significant variation that explained the difference between the microbiome of healthy and IBS subtypes

149 (R<sup>2</sup> = 0.028, p < 0.001). We performed a random forest analysis to identify the distinguishing microbes  
150 between healthy and IBS phenotypes. To identify statistically significant changes in the relative  
151 abundances of microbes within healthy or IBS subtypes, we performed an unpaired t-test and adjusted p-  
152 values for multiple testing corrections. This analysis revealed *Eubacterium rectale* and *Faecalibacterium*  
153 *prausnitzii* as significantly increased microbial species in the healthy control population relative to all IBS  
154 subtypes (Figure 2), while we found inflammatory species of *Shigella* elevated in IBS (Figure 2). We  
155 further interrogated the microbial differences between IBS subtypes and found that *Paraprevotella clara*,  
156 *Prevotella corporis*, *Roseburia intestinalis* and *Ruminococcus lactaris* significantly decreased in different  
157 IBS subtypes relative to the healthy control population (Figure 2).

158

159 *Functional profile of the gut microbiome of subjects with IBS and healthy*

160

161 To determine the functional profiles of the gut microbiome associated with IBS, we mapped the  
162 metagenomic reads against the MetaCyc database with Humann3 to identify pathway abundances. There  
163 was a total of 471 pathways detected in the metagenomes of healthy and individuals with IBS.  
164 Multivariate linear association testing identified pathways associated with each IBS dominant subtype  
165 relative to the healthy control cohort (Figure 2). Pathways involved in tetrapyrrole biosynthesis from  
166 glycine, enterobacterial common antigen biosynthesis, NADP/NADPH interconversion, and the super  
167 pathway of heme b biosynthesis from glutamate were positively associated with IBS-A (Figure 2).  
168 Methanogenesis from acetate was associated with IBS-C and IBS-D (Figure 2). Pathways involved in the  
169 *Bifidobacterium* shunt, the super pathway of glycerol degradation to 1,3-propanediol, and starch  
170 biosynthesis were associated with IBS-C (Figure 2). Meanwhile, pathways associated with amino acid  
171 and ribonucleotide biosynthesis, polysaccharide degradation, and fermentation were associated with  
172 healthy microbiome functional profiles (Figure 2).

173

174 *Probiotics may modulate the microbiome of subjects with IBS*

175

176 Within a subset of the IBS population, there were 134 individuals with at least two timepoints and  
177 56 individuals with three timepoints. The average number of days between timepoint 1 and 2 was  $154.8 \pm$   
178  $80.5$  (standard deviation, SD) days, and timepoint 2 and 3 was  $194.9 \pm 144.5$  (SD) days. To investigate  
179 whether there were changes in alpha diversity across time, we performed linear mixed effects models to  
180 control for the effect from the individual. Based on the calculations on the longitudinal dataset controlling  
181 for the individual, there were no significant increases in the Shannon index, richness, or evenness.  
182 Although not significant, there may be an increase in the Shannon index across timepoints 1-3 (Figure 3).  
183 Next, we calculated the Bray-Curtis similarity of microbiome composition to investigate changes in the  
184 microbiome across time. There was no significant difference from one timepoint to the next (Figure 3), or  
185 when comparing the first timepoint with each subsequent timepoint (data not shown). However, there was

186 a shift in the median towards lower Bray-Curtis similarity indices across longitudinal timepoints 1-5  
187 towards a lower similarity index (Figure 3). A permuted multivariate analysis of variance was performed  
188 across all timepoints to calculate microbiome variance across longitudinal samples. There was a  
189 significant difference between all longitudinal samples from timepoint 1 and timepoint 3 ( $R^2 = 0.0088$ ,  $p =$   
190  $0.035$ ). Average days separating timepoints 1 and 3 were  $335.9 \pm 170.5$  (SD) days. When computing the  
191 variance for subjects with both timepoints, we resolved no significant variation within the microbiome  
192 data. Considering the microbiome composition and health and diet survey information, we calculated the  
193 microbiome score for each sample and saw a significant increase in the overall microbiome score across  
194 timepoints 1-3 (Figure 3).

195  
196 Because there were different subtypes associated with IBS included in our population, we  
197 investigated whether the individually formulated probiotics targeted towards relieving the symptoms of  
198 constipation and diarrhea increased in abundance in the microbiomes of the IBS population. Each  
199 formulation contained approximately 4-8 probiotic strains, each at different concentrations. One of the  
200 common probiotics formulated for constipation was *Bifidobacterium longum* and the formulations for  
201 diarrhea included *Bifidobacterium breve* and *Lactobacillus rhamnosus*. In the longitudinal dataset, *B.*  
202 *breve* and *L. rhamnosus* significantly increased in abundance across time (Figure 3). *B. breve*  
203 significantly increased from timepoint 1 to 2 and 3, but there was no significant change between the 2<sup>nd</sup>  
204 and 3<sup>rd</sup> timepoints (Figure 3). *L. rhamnosus* was significantly increased in abundance at timepoint 3  
205 compared to timepoint 1 (Figure 3). There was not a significant increase in the relative abundance of *B.*  
206 *longum* across timepoints 1-3.

## 207 208 **Discussion**

209  
210 Although IBS is prevalent across the population, the underlying factors contributing to the syndrome  
211 makes diagnosis and treatment challenging to define and standardize. Previous amplicon-based studies  
212 have identified changes in microbiome composition and diversity in individuals with IBS compared to a  
213 healthy control population (29, 30). Concomitant with previous findings, our study corroborates the  
214 significant microbial community composition differences and diversity between healthy individuals and  
215 people with IBS. Unlike other studies, whole metagenome shotgun sequencing enabled us to identify  
216 pathways associated with the dominant subtypes of IBS. In addition, our precision probiotics for  
217 individuals with IBS showed a significant microbiome score improvement across time. Clinical studies that  
218 administer probiotics to individuals with IBS have shown reduced symptom severity and gut discomfort  
219 (25–27). Although we did not find a significant change in alpha or beta diversity in the longitudinal IBS  
220 profiles with probiotic supplementation, there was a significant increase in the relative abundances of  
221 probiotics detected in the gut microbiomes. Of subjects with three timepoints, 91% had all three of the  
222 common probiotic species we included in formulations. These results indicate that probiotic

223 supplementation may be changing microbial community composition and function that may alleviate IBS  
224 symptoms. Further research is needed to assess longitudinal changes in microbiome function in response  
225 to probiotics in IBS.

226

227 In the microbiome composition of individuals with IBS, there was a significant reduction in alpha  
228 diversity and anti-inflammatory microbes while there was an increase in inflammatory microbes. A  
229 reduction in alpha diversity in the microbiome may indicate a loss of microbial species in response to  
230 different environmental factors (i.e., antibiotics) or a presence of microbial players that may be driving the  
231 reduction in diversity. For example, there was increased abundance in *Klebsiella* and  
232 *Escherichia/Shigella* in small intestinal bacterial overgrowth and a reduced duodenal microbiome diversity  
233 (31). Consistent with IBS-A, IBS-C, and Crohn's disease studies, we found lower relative abundances of  
234 the anti-inflammatory microbe *F. prausnitzii* in individuals with IBS than the healthy cohort (29, 32–35). In  
235 contrast to previous amplicon-based studies that did not find a reduced abundance of *F. prausnitzii* in  
236 IBS-D (35–37), we detected *F. prausnitzii* at lower levels in IBS-D. *F. prausnitzii* enhances gut barrier  
237 protection and produces butyrate, a short chain fatty acid essential for gut health (29, 32, 38, 39).  
238 *Roseburia intestinalis* has an anti-inflammatory role in the gut and is reduced in individuals with Crohn's  
239 disease (40, 41). *R. intestinalis* was significantly reduced in IBS-C and IBS-D subtype (Figure 2). *Shigella*  
240 *spp.*, a major contributor to diarrheal disease (42) and associated with post-infectious IBS (43), was found  
241 to be increased in the IBS subtypes (Figure 2). These variations in the microbial signature was taken into  
242 account for the internal health index score. The scoring system is highly dependent on the microbial  
243 abundance levels in the profile and their association with gastrointestinal conditions like IBS (43, 44) and  
244 balance of the gut ecosystem, including the presence *Faecalibacterium* (32–34, 38, 39).

245

246 The other differentially abundant microbes have an unclear role in IBS. *Ruminococcus lactaris* is  
247 negatively correlated to IL-8 (45) and is more abundant in a non-chronic kidney disease cohort (46), but  
248 has also been shown to be associated with a high-fat diet in a murine diabetes model (47). *Eubacterium*  
249 *rectale* is a butyrate producer associated with infant gut microbiome development (48), but is also  
250 associated with obesity and dysbiosis (49). In a recent metagenomic assembly study of *E. rectale*, there  
251 were different subspecies due to genetic and geographic dispersal in human populations, revealing  
252 differences in subspecies physiologies and metabolisms (50). *Prevotella spp.* is common in non-western  
253 plant-rich diets (51) and decreased in individuals with constipation (52), but has also been associated with  
254 chronic inflammatory conditions (53, 54). These studies indicate that the role of some microbes detected  
255 in this study is context and environmentally dependent.

256

257 Functional analysis identified pathways associated with each of the phenotypic classifications of IBS.  
258 The methanogenesis from an acetate pathway was associated with IBS-C (Figure 2). Methanogenesis  
259 contributes to methane production, which is correlated to the severity of constipation (55) and may be

260 useful as a diagnostic indicator of constipation predominant IBS (56, 57). Surprisingly, methanogenesis  
261 was also associated with IBS-D. Previous studies have demonstrated the reduction of methanogens in  
262 IBS-D (58). However, *Blautia spp.* and *Fusicatenibacter* were microbes detected to have genes that  
263 contribute to the methanogenesis pathway (Table S1). *Blautia spp.* and *Fusicatenibacter* produce short-  
264 chain fatty acids and gases through carbohydrate fermentation, substrates for methanogenesis. An  
265 overabundance of methanogenesis may lead to gut symptoms in IBS. The *Bifidobacterium* shunt was  
266 also associated with IBS-C. The *Bifidobacterium* shunt, also called the fructose-6-phosphate shunt,  
267 produces short-chain fatty acids (SCFA) and other organic compounds (59, 60). Depending on the  
268 chemical and microbial microenvironment, SCFA can regulate the growth and virulence of enteric  
269 pathogens (61). In addition, SCFA stimulates water absorption in the colon (62). If too much water is  
270 absorbed, the stool becomes more solid, resulting in constipation. Thus, factors affecting host physiology  
271 in IBS may depend upon the microenvironments and microbes present in the gut.

272  
273 The enterobacterial common antigen (ECA) biosynthesis pathway was associated with IBS-A. The  
274 ECA is one of the components of the outer membrane of Gram-negative bacteria and its association with  
275 IBS-A may indicate the increased presence of *Enterobacterales* in the gut microbiome. Interestingly, the  
276 ECA may contribute to virulence and protect enteric pathogens from bile salts and antibiotics (63–65).  
277 Bile acids protect the host from infection, contributing to overall gut intestinal health (66). ECA protection  
278 against bile acids and antibiotics may make IBS-A challenging to treat with antibiotics and may contribute  
279 to dysbiosis. These results suggest that common antibiotic treatments for IBS may not be ideal for  
280 alleviating symptoms or treating the possible underlying microbiome triggers associated with IBS-A.

281  
282 Pathways associated with healthy microbiomes were amino acid and ribonucleotide synthesis,  
283 polysaccharide degradation, and fermentation. L-methionine biosynthesis by sulfhydrylation and cysteine  
284 biosynthesis implies the presence of hydrogen sulfide in the gut (67). An overabundance of hydrogen  
285 sulfide induces inflammation, while low levels protect the gut lining and microbes against reactive oxygen  
286 species (68–70). Polysaccharide degradation, specifically beta-mannan degradation, is primarily driven  
287 by *Roseburia intestinalis* and the metabolic output has been shown to promote gut health (71). As  
288 products of fermentation, the role of SCFA has been implicated in cardiovascular and neurologic  
289 pathologies (72–74). The thiamine diphosphate biosynthesis pathway was associated with healthy gut  
290 metagenomes while negatively associated with IBS-A (Figure 2). A thiamine deficiency has been shown  
291 to increase risk for lifelong neurodevelopmental consequences and is associated with many  
292 cardiovascular diseases (75, 76). These results demonstrate the balance of metabolites must be  
293 regulated to maintain gut homeostasis and overall health. When the chemical and microbiome balance is  
294 disrupted, host physiology may be affected, leading to worsening gut symptoms or onset of disease.

295



296 IBS is heterogeneous; a universal cocktail of probiotics may not comprehensively target all symptoms  
297 experienced by individuals with IBS. Therefore, one of our goals is to individually formulate prebiotics and  
298 probiotics to address the more common symptoms experienced by individuals with IBS. There were three  
299 common strains included in formulas to specifically target constipation and diarrhea. *Bifidobacterium*  
300 *longum* was included in formulations for constipation (77, 78). *B. breve* and *Lactobacillus rhamnosus*  
301 were included in formulations for diarrhea (79–84). Each of these probiotics were added to formulas for a  
302 total of 4-8 different probiotic strains at different concentrations.

303

304 In probiotic studies, most strains are detectable for less than 2 weeks following the cessation of  
305 probiotic supplementation (85–87). Because individuals in this study took daily probiotic supplements  
306 across a longitudinal time period (4 months between each microbiome test), we investigated microbiome  
307 changes in response to daily probiotic supplementation. There was no significant change in alpha or beta  
308 diversity across time in the population, but there may have been changes in diversity within the individual  
309 (Figure 3). However, there was a shift in beta diversity of the microbiome from one timepoint to the next,  
310 indicating there may be changes in microbiome composition in response to probiotic supplementation  
311 (Figure 3). Thus, diversity metrics that compare population-level information may not show the impact of  
312 probiotic usage, but may influence smaller communities within the gut with postbiotic release.

313

314 In addition to the diversity metrics calculated, we calculated an overall microbiome score to consider  
315 the microbiome composition and health and diet survey. Across timepoints 1-3, there was a significant  
316 increase in the microbiome score, indicating an improvement in the overall microbiome and symptoms in  
317 response to precision probiotic supplementation. When investigating individual probiotics, *Bifidobacterium*  
318 *longum* did not significantly increase across timepoints in the IBS subjects even when provided in  
319 precision formulations. The presence of *B. longum* may promote gut health through cross-feeding  
320 mechanisms that lead to the production of short-chain fatty acids (88, 89). *B. breve* and *L. rhamnosus*  
321 increased in relative abundance across time in individuals with IBS, indicating colonization of the gut  
322 microbiome that may contribute to positive changes in microbiome physiology. Further investigation is  
323 needed to identify potential functional changes in microbiome metabolism with daily prebiotic and  
324 probiotic supplementation in IBS and whether symptoms associated with IBS can be improved.

325

326 There are several limitations to this current study. First, the self-reporting nature of IBS is a  
327 limitation to this study. For official diagnosis of IBS, the Rome IV criteria assesses symptoms related to  
328 stool consistency and appearance, recurrent abdominal pain, and changes in bowel habits (90, 91).  
329 Although the health and diet questionnaire included questions regarding gut symptoms and chronic  
330 conditions, a formal diagnosis was not verified. For potential life-style modifications in addition to probiotic  
331 supplementation, diet changes may also be an important factor in alleviating symptoms or changing the  
332 microbiome (92–94). Low FODMAP diet (LFD) and low lactose diet (LLD) reduced the IBS-SSS score.

333 IBS subjects on LFD had significantly less abdominal pain, bloating, and gas production (93). These diet  
334 interventions were not accessed in this study. Second, this study was not designed to investigate  
335 longitudinal assessments of comprehensive gut issues experienced by the individuals with IBS. This  
336 hindered us to identify whether gut symptoms were alleviated by daily probiotic supplementation or  
337 whether there were associations with certain probiotic formulations in improving certain symptoms in IBS.  
338 However, because the relative abundance of the common probiotics formulated for constipation and  
339 diarrhea were increased in relative abundance across time, these results may inform future studies.  
340 Additional research is also needed to determine the roles of specific pathways in the etiology of IBS.

341  
342 In summary, we reported differentially abundant microbes and functional pathways associated  
343 with IBS. We also identified an increased relative abundance of probiotics in the gut microbiomes of  
344 people with IBS across time. These data may help inform future studies and therapeutic strategies by  
345 identifying important microbes and pathways associated with each IBS subtype. As IBS is a multi-factorial  
346 syndrome, there is no one-size-fits-all approach to target all symptoms experienced by individuals with  
347 IBS. A combination of diet and probiotics may be needed to alleviate symptoms of IBS. Longitudinal  
348 monitoring of the gut microbiome is also important to understand changes associated with symptom  
349 progression. Precision probiotics may help target individual needs, although further research is needed to  
350 identify the pathway benefits of prebiotic and probiotic supplementation on health.

351

## 352 **Materials and Methods**

353

### 354 *Participants and sample collection*

355

356 Users of our (Sun Genomics, San Diego) commercial gut microbiome testing component (Floré  
357 Gut Health Test Kit) submitted a stool sample for metagenomic sequencing. The stool sample was  
358 collected by the user with provided gut testing kit instructions. Samples were collected in accordance with  
359 IRB # SG-04142018-001 with informed consent form 001-B. A sterile swab was used for the first  
360 collection device to collect and store the stool sample in a collection tube with stabilization buffer. The  
361 second sample was collected via the Easi-Collect device (GE). Samples were mailed via FedEx to the  
362 Sun Genomics lab for analysis.

363

364 A total of 611 participants were included in this study (Table 1). All participants completed a  
365 health and diet survey that asked questions about health status and dietary preferences. The control  
366 population included in this study was self-reported as healthy with no listed comorbidities with a BMI  
367 range from 18.5 – 25 (Table 1) (95). The IBS population was also self-reported and included the  
368 symptoms associated with the syndrome, including constipation, diarrhea, a mix of both constipation and  
369 diarrhea, or unspecified.

370

371 *Metagenomic sequencing and analysis*

372

373 For DNA extractions, samples were first processed with a tissue homogenizer and then lysed with  
374 a lysis buffer and proteinase K. DNA was extracted and purified with a proprietary method (Patent  
375 #10428370 and #10837046 - Universal Method For Extracting Nucleic Acids Molecules From A Diverse  
376 Population Of One Or More Types Of Microbes In A Sample). Library preparation was performed with  
377 DNA sonication, end-repair, and adaptor ligation with NEBNext reagents. Size selection was performed  
378 with MagJet Magnetic Beads according to manufacturer instructions. Library quantitation was performed  
379 with qPCR and sequenced on an Illumina NextSeq 550 (Illumina, San Diego). After sequencing, reads  
380 were quality filtered and processed. Metagenomic reads were decontaminated from human reads using  
381 Bowtie2. After decontamination, there was an average of 6,581,844 reads per sample (SD = 4,426,117)  
382 with a minimum of one million reads to be included in downstream analyses. Next, reads were aligned to  
383 a hand curated database of over 23,000 species. Humann3 was used for pathway analysis (96). Pathway  
384 abundance was normalized to copies per million (cpm).

385

386 *Statistical analyses*

387

388 All statistical analyses were performed in R. Principal coordinates analysis was performed with a  
389 Bray-Curtis dissimilarity matrix to compare between sample diversities. Within sample diversity was  
390 calculated with the Shannon diversity index. To calculate variance between samples based on metadata  
391 classifications, permutational multivariate analysis of variance (PERMANOVA) was performed with the  
392 “adonis” function from the “vegan” package (97). Specifically, the influence of health status was computed  
393 across the microbiome composition and pathway abundance profiles. MaasLin2 was used for  
394 distinguishing pathway features between healthy and IBS subtypes (98).

395

396 **References**

397

- 398 1. Hungin APS, Whorwell PJ, Tack J, Mearin F. 2003. The prevalence, patterns and impact of irritable  
399 bowel syndrome: an international survey of 40,000 subjects. *Aliment Pharmacol Ther* 17:643–650.
- 400 2. Canavan C, West J, Card T. 2015. Change in Quality of Life for Patients with Irritable Bowel  
401 Syndrome following Referral to a Gastroenterologist: A Cohort Study. *PLoS ONE* 10:e0139389.
- 402 3. Poulsen CH, Epløv LF, Hjorthøj C, Hastrup LH, Eliassen M, Dantoft TM, Schröder A, Jørgensen T.  
403 2019. Irritable bowel symptoms, use of healthcare, costs, sickness and disability pension benefits: A  
404 long-term population-based study. *Scand J Public Health* 47:867–875.

- 405 4. Halpert A, Dalton CB, Palsson O, Morris C, Hu Y, Bangdiwala S, Hankins J, Norton N, Drossman DA.  
406 2010. Irritable bowel syndrome patients' ideal expectations and recent experiences with healthcare  
407 providers: a national survey. *Dig Dis Sci* 55:375–383.
- 408 5. Sabaté J-M, Rivièrè S, Jouet P, Gastaldi-Menager C, Fagot-Campagna A, Tuppin P. 2019.  
409 Healthcare use by 30,000 patients with irritable bowel syndrome (IBS) in France: a 5-year  
410 retrospective and one-year prospective national observational study. *BMC Gastroenterol* 19:111.
- 411 6. Lacy BE, Mearin F, Chang L, Chey WD, Lembo AJ, Simren M, Spiller R. 2016. Bowel Disorders.  
412 *Gastroenterology* 150:1393-1407.e5.
- 413 7. Sperber AD, Bangdiwala SI, Drossman DA, Ghoshal UC, Simren M, Tack J, Whitehead WE,  
414 Dumitrascu DL, Fang X, Fukudo S, Kellow J, Okeke E, Quigley EMM, Schmulson M, Whorwell P,  
415 Archanpong T, Adibi P, Andresen V, Benninga MA, Bonaz B, Bor S, Fernandez LB, Choi SC,  
416 Corazziari ES, Francisconi C, Hani A, Lazebnik L, Lee YY, Mulak A, Rahman MM, Santos J,  
417 Setshedi M, Syam AF, Vanner S, Wong RK, Lopez-Colombo A, Costa V, Dickman R, Kanazawa M,  
418 Keshteli AH, Khatun R, Maleki I, Poitras P, Pratap N, Stefanyuk O, Thomson S, Zeevenhooven J,  
419 Palsson OS. 2021. Worldwide Prevalence and Burden of Functional Gastrointestinal Disorders,  
420 Results of Rome Foundation Global Study. *Gastroenterology* 160:99-114.e3.
- 421 8. Bellini M, Gambaccini D, Stasi C, Urbano MT, Marchi S, Usai-Satta P. 2014. Irritable bowel  
422 syndrome: A disease still searching for pathogenesis, diagnosis and therapy. *World J Gastroenterol*  
423 *WJG* 20:8807–8820.
- 424 9. Ford AC, Lacy BE, Talley NJ. 2017. Irritable Bowel Syndrome.  
425 <http://dx.doi.org/101056/NEJMra1607547>. review-article, Massachusetts Medical Society.
- 426 10. Tap J, Störsrud S, Le Nevé B, Cotillard A, Pons N, Doré J, Öhman L, Törnblom H, Derrien M, Simrén  
427 M. 2021. Diet and gut microbiome interactions of relevance for symptoms in irritable bowel syndrome.  
428 *Microbiome* 9:74.
- 429 11. Meydan C, Afshinnekoo E, Rickard N, Daniels G, Kunces L, Hardy T, Lili L, Pesce S, Jacobson P,  
430 Mason CE, Dudley J, Zhang B. 2020. Improved gastrointestinal health for irritable bowel syndrome  
431 with metagenome-guided interventions. *Precis Clin Med* 3:136–146.
- 432 12. Tap J, Derrien M, Törnblom H, Brazeilles R, Cools-Portier S, Doré J, Störsrud S, Le Nevé B, Öhman  
433 L, Simrén M. 2017. Identification of an Intestinal Microbiota Signature Associated With Severity of  
434 Irritable Bowel Syndrome. *Gastroenterology* 152:111-123.e8.

- 435 13. Fukui H, Nishida A, Matsuda S, Kira F, Watanabe S, Kuriyama M, Kawakami K, Aikawa Y, Oda N,  
436 Arai K, Matsunaga A, Nonaka M, Nakai K, Shinmura W, Matsumoto M, Morishita S, Takeda AK,  
437 Miwa H. 2020. Usefulness of Machine Learning-Based Gut Microbiome Analysis for Identifying  
438 Patients with Irritable Bowels Syndrome. 8. *J Clin Med* 9:2403.
- 439 14. Hugerth LW, Andreasson A, Talley NJ, Forsberg AM, Kjellström L, Schmidt PT, Agreus L, Engstrand  
440 L. 2020. No distinct microbiome signature of irritable bowel syndrome found in a Swedish random  
441 population. *Gut* 69:1076–1084.
- 442 15. Algera J, Colomier E, Simrén M. 2019. The Dietary Management of Patients with Irritable Bowel  
443 Syndrome: A Narrative Review of the Existing and Emerging Evidence. *Nutrients* 11:2162.
- 444 16. Lembo A, Pimentel M, Rao SS, Schoenfeld P, Cash B, Weinstock LB, Paterson C, Bortey E, Forbes  
445 WP. 2016. Repeat Treatment With Rifaximin Is Safe and Effective in Patients With Diarrhea-  
446 Predominant Irritable Bowel Syndrome. *Gastroenterology* 151:1113–1121.
- 447 17. Li Y, Hong G, Yang M, Li G, Jin Y, Xiong H, Qian W, Hou X. 2020. Fecal bacteria can predict the  
448 efficacy of rifaximin in patients with diarrhea-predominant irritable bowel syndrome. *Pharmacol Res*  
449 159:104936.
- 450 18. Krogsgaard LR, Engsbro AL, Bytzer P. 2018. Antibiotics: a risk factor for irritable bowel syndrome in  
451 a population-based cohort. *Scand J Gastroenterol* 53:1027–1030.
- 452 19. Pimentel M, Chang C, Chua KS, Mirocha J, DiBaise J, Rao S, Amichai M. 2014. Antibiotic Treatment  
453 of Constipation-Predominant Irritable Bowel Syndrome. *Dig Dis Sci* 59:1278–1285.
- 454 20. Paula H, Grover M, Halder SL, Locke GR, Schleck CD, Zinsmeister AR, Talley NJ. 2015. Non-enteric  
455 infections, antibiotic use, and risk of development of functional gastrointestinal disorders.  
456 *Neurogastroenterol Motil Off J Eur Gastrointest Motil Soc* 27:1580–1586.
- 457 21. Klem F, Wadhwa A, Prokop LJ, Sundt WJ, Farrugia G, Camilleri M, Singh S, Grover M. 2017.  
458 Prevalence, Risk Factors, and Outcomes of Irritable Bowel Syndrome After Infectious Enteritis: A  
459 Systematic Review and Meta-analysis. *Gastroenterology* 152:1042-1054.e1.
- 460 22. Brigidi P, Vitali B, Swennen E, Bazzocchi G, Matteuzzi D. 2001. Effects of probiotic administration  
461 upon the composition and enzymatic activity of human fecal microbiota in patients with irritable bowel  
462 syndrome or functional diarrhea. *Res Microbiol* 152:735–741.
- 463 23. Hou Q, Zhao F, Liu W, Lv R, Khine WWT, Han J, Sun Z, Lee Y-K, Zhang H. 2020. Probiotic-directed  
464 modulation of gut microbiota is basal microbiome dependent. *Gut Microbes* 12:1736974.

- 465 24. Maldonado-Gómez MX, Martínez I, Bottacini F, O'Callaghan A, Ventura M, van Sinderen D, Hillmann  
466 B, Vangay P, Knights D, Hutkins RW, Walter J. 2016. Stable Engraftment of *Bifidobacterium longum*  
467 AH1206 in the Human Gut Depends on Individualized Features of the Resident Microbiome. *Cell*  
468 *Host Microbe* 20:515–526.
- 469 25. Kim J, Cho K, Kim JS, Jung HC, Kim B, Park MS, Ji GE, Cho J-Y, Hong KS. 2020. Probiotic  
470 treatment induced change of inflammation related metabolites in IBS-D patients/double-blind,  
471 randomized, placebo-controlled trial. *Food Sci Biotechnol* 29:837–844.
- 472 26. Francavilla R, Piccolo M, Francavilla A, Polimeno L, Semeraro F, Cristofori F, Castellaneta S, Barone  
473 M, Indrio F, Gobetti M, De Angelis M. 2019. Clinical and Microbiological Effect of a Multispecies  
474 Probiotic Supplementation in Celiac Patients With Persistent IBS-type Symptoms. *J Clin*  
475 *Gastroenterol* 53:e117–e125.
- 476 27. Fan Y, Chen S, Yu Y, Si J, Liu B. 2006. A probiotic treatment containing *Lactobacillus*,  
477 *Bifidobacterium* and *Enterococcus* improves IBS symptoms in an open label trial. *J Zhejiang Univ Sci*  
478 *B* 7:987–991.
- 479 28. Drouault-Holowacz S, Bieuevet S, Burckel A, Cazaubiel M, Dray X, Marteau P. 2008. A double blind  
480 randomized controlled trial of a probiotic combination in 100 patients with irritable bowel syndrome.  
481 *Gastroentérologie Clin Biol* 32:147–152.
- 482 29. Agnello M, Carroll LN, Imam N, Pino R, Palmer C, Varas I, Greene C, Hitschfeld M, Gupta S,  
483 Almonacid DE, Hoaglin MC. 2020. Gut microbiome composition and risk factors in a large cross-  
484 sectional IBS cohort. *BMJ Open Gastroenterol* 7:e000345.
- 485 30. Lo Presti A, Zorzi F, Del Chierico F, Altomare A, Cocca S, Avola A, De Biasio F, Russo A, Cella E,  
486 Reddel S, Calabrese E, Biancone L, Monteleone G, Cicala M, Angeletti S, Ciccozzi M, Putignani L,  
487 Guarino MPL. 2019. Fecal and Mucosal Microbiota Profiling in Irritable Bowel Syndrome and  
488 Inflammatory Bowel Disease. *Front Microbiol* 0.
- 489 31. Leite G, Morales W, Weitsman S, Celly S, Parodi G, Mathur R, Barlow GM, Sedighi R, Millan MJV,  
490 Rezaie A, Pimentel M. 2020. The duodenal microbiome is altered in small intestinal bacterial  
491 overgrowth. *PLOS ONE* 15:e0234906.
- 492 32. Sokol H, Pigneur B, Watterlot L, Lakhdari O, Bermúdez-Humarán LG, Gratadoux J-J, Blugeon S,  
493 Bridonneau C, Furet J-P, Corthier G, Grangette C, Vasquez N, Pochart P, Trugnan G, Thomas G,  
494 Blottière HM, Doré J, Marteau P, Seksik P, Langella P. 2008. *Faecalibacterium prausnitzii* is an anti-  
495 inflammatory commensal bacterium identified by gut microbiota analysis of Crohn disease patients.  
496 *Proc Natl Acad Sci* 105:16731–16736.

- 497 33. Sokol H, Seksik P, Furet JP, Firmesse O, Nion-Larmurier I, Beaugerie L, Cosnes J, Corthier G,  
498 Marteau P, Doré J. 2009. Low Counts of *Faecalibacterium prausnitzii* in Colitis Microbiota. *Inflamm*  
499 *Bowel Dis* 15:1183–1189.
- 500 34. Varela E, Manichanh C, Gallart M, Torrejón A, Borrueal N, Casellas F, Guarner F, Antolin M. 2013.  
501 Colonisation by *Faecalibacterium prausnitzii* and maintenance of clinical remission in patients with  
502 ulcerative colitis. *Aliment Pharmacol Ther* 38:151–161.
- 503 35. Rajilić–Stojanović M, Biagi E, Heilig HGJ, Kajander K, Kekkonen RA, Tims S, de Vos WM. 2011.  
504 Global and Deep Molecular Analysis of Microbiota Signatures in Fecal Samples From Patients With  
505 Irritable Bowel Syndrome. *Gastroenterology* 141:1792–1801.
- 506 36. Duboc H, Rainteau D, Rajca S, Humbert L, Farabos D, Maubert M, Grondin V, Jouet P, Bouhassira  
507 D, Seksik P, Sokol H, Coffin B, Sabaté JM. 2012. Increase in fecal primary bile acids and dysbiosis in  
508 patients with diarrhea-predominant irritable bowel syndrome. *Neurogastroenterol Motil* 24:513-e247.
- 509 37. Rigsbee L, Agans R, Shankar V, Kenche H, Khamis HJ, Michail S, Paliy O. 2012. Quantitative  
510 Profiling of Gut Microbiota of Children With Diarrhea-Predominant Irritable Bowel Syndrome. *Off J*  
511 *Am Coll Gastroenterol ACG* 107:1740–1751.
- 512 38. Miquel S, Martín R, Bridonneau C, Robert V, Sokol H, Bermúdez-Humarán LG, Thomas M, Langella  
513 P. 2014. Ecology and metabolism of the beneficial intestinal commensal bacterium *Faecalibacterium*  
514 *prausnitzii*. *Gut Microbes* 5:146–151.
- 515 39. He X, Zhao S, Li Y. 2021. *Faecalibacterium prausnitzii*: A Next-Generation Probiotic in Gut Disease  
516 Improvement. *Can J Infect Dis Med Microbiol* 2021:e6666114.
- 517 40. Zhu C, Song K, Shen Z, Quan Y, Tan B, Luo W, Wu S, Tang K, Yang Z, Wang X. 2018. *Roseburia*  
518 *intestinalis* inhibits interleukin-17 excretion and promotes regulatory T cells differentiation in colitis.  
519 *Mol Med Rep* 17:7567–7574.
- 520 41. Shen Z, Zhu C, Quan Y, Yang J, Yuan W, Yang Z, Wu S, Luo W, Tan B, Wang X. 2018. Insights into  
521 *Roseburia intestinalis* which alleviates experimental colitis pathology by inducing anti-inflammatory  
522 responses. *J Gastroenterol Hepatol* 33:1751–1760.
- 523 42. Baker S, The HC. 2018. Recent insights into *Shigella*: a major contributor to the global diarrhoeal  
524 disease burden. *Curr Opin Infect Dis* 31:449–454.
- 525 43. Ji S, Park H, Lee D, Song YK, Choi JP, Lee S-I. 2005. Post-infectious irritable bowel syndrome in  
526 patients with *Shigella* infection. *J Gastroenterol Hepatol* 20:381–386.

- 527 44. Jalanka J, Salonen A, Fuentes S, de Vos WM. 2015. Microbial signatures in post-infectious irritable  
528 bowel syndrome--toward patient stratification for improved diagnostics and treatment. *Gut Microbes*  
529 6:364–369.
- 530 45. Biagi E, Nylund L, Candela M, Ostan R, Bucci L, Pini E, Nikkila J, Monti D, Satokari R, Franceschi C,  
531 Brigidi P, Vos WD. 2010. Through Ageing, and Beyond: Gut Microbiota and Inflammatory Status in  
532 Seniors and Centenarians. *PLOS ONE* 5:e10667.
- 533 46. Sato N, Kakuta M, Hasegawa T, Yamaguchi R, Uchino E, Murashita K, Nakaji S, Imoto S, Yanagita  
534 M, Okuno Y. 2020. Metagenomic profiling of gut microbiome in early chronic kidney disease. *Nephrol*  
535 *Dial Transplant* <https://doi.org/10.1093/ndt/gfaa122>.
- 536 47. Chung E, Elmassry MM, Kottapalli P, Kottapalli KR, Kaur G, Dufour JM, Wright K, Ramalingam L,  
537 Moustaid-Moussa N, Wang R, Hamood AN, Shen C-L. 2020. Metabolic benefits of annatto-extracted  
538 tocotrienol on glucose homeostasis, inflammation, and gut microbiome. *Nutr Res* 77:97–107.
- 539 48. Nilsen M, Madelen Saunders C, Leena Angell I, Arntzen MØ, Lødrup Carlsen KC, Carlsen K-H,  
540 Haugen G, Haldal Hagen L, Carlsen MH, Hedlin G, Monceyron Jonassen C, Nordlund B, Maria  
541 Reh binder E, Skjerven HO, Snipen L, Cathrine Staff A, Vettukattil R, Rudi K. 2020. Butyrate Levels in  
542 the Transition from an Infant- to an Adult-Like Gut Microbiota Correlate with Bacterial Networks  
543 Associated with *Eubacterium Rectale* and *Ruminococcus Gnavus*. 11. *Genes* 11:1245.
- 544 49. Gomes AC, Hoffmann C, Mota JF. 2018. The human gut microbiota: Metabolism and perspective in  
545 obesity. *Gut Microbes* 9:308–325.
- 546 50. Karcher N, Pasolli E, Asnicar F, Huang KD, Tett A, Manara S, Armanini F, Bain D, Duncan SH, Louis  
547 P, Zolfo M, Manghi P, Valles-Colomer M, Raffaetà R, Rota-Stabelli O, Collado MC, Zeller G, Falush  
548 D, Maixner F, Walker AW, Huttenhower C, Segata N. 2020. Analysis of 1321 *Eubacterium rectale*  
549 genomes from metagenomes uncovers complex phylogeographic population structure and  
550 subspecies functional adaptations. *Genome Biol* 21:138.
- 551 51. Martínez I, Stegen JC, Maldonado-Gómez MX, Eren AM, Siba PM, Greenhill AR, Walter J. 2015. The  
552 Gut Microbiota of Rural Papua New Guineans: Composition, Diversity Patterns, and Ecological  
553 Processes. *Cell Rep* 11:527–538.
- 554 52. Zhu L, Liu W, Alkhouri R, Baker RD, Bard JE, Quigley EM, Baker SS. 2014. Structural changes in the  
555 gut microbiome of constipated patients. *Physiol Genomics* 46:679–686.



- 556 53. Scher JU, Sczesnak A, Longman RS, Segata N, Ubeda C, Bielski C, Rostron T, Cerundolo V, Pamer  
557 EG, Abramson SB, Huttenhower C, Littman DR. 2013. Expansion of intestinal *Prevotella copri*  
558 correlates with enhanced susceptibility to arthritis. *eLife* 2:e01202.
- 559 54. Dillon SM, Lee EJ, Kotter CV, Austin GL, Gianella S, Siewe B, Smith DM, Landay AL, McManus MC,  
560 Robertson CE, Frank DN, McCarter MD, Wilson CC. 2016. Gut dendritic cell activation links an  
561 altered colonic microbiome to mucosal and systemic T-cell activation in untreated HIV-1 infection.  
562 *Mucosal Immunol* 9:24–37.
- 563 55. Chatterjee S, Park S, Low K, Kong Y, Pimentel M. 2007. The degree of breath methane production in  
564 IBS correlates with the severity of constipation. *Am J Gastroenterol* 102:837–841.
- 565 56. Hwang L, Low K, Khoshini R, Melmed G, Sahakian A, Makhani M, Pokkunuri V, Pimentel M. 2010.  
566 Evaluating breath methane as a diagnostic test for constipation-predominant IBS. *Dig Dis Sci*  
567 55:398–403.
- 568 57. Kim G, Deepinder F, Morales W, Hwang L, Weitsman S, Chang C, Gunsalus R, Pimentel M. 2012.  
569 *Methanobrevibacter smithii* is the predominant methanogen in patients with constipation-predominant  
570 IBS and methane on breath. *Dig Dis Sci* 57:3213–3218.
- 571 58. Pozuelo M, Panda S, Santiago A, Mendez S, Accarino A, Santos J, Guarner F, Azpiroz F, Manichanh  
572 C. 2015. Reduction of butyrate- and methane-producing microorganisms in patients with Irritable  
573 Bowel Syndrome. *Sci Rep* 5:12693.
- 574 59. Pokusaeva K, Fitzgerald GF, van Sinderen D. 2011. Carbohydrate metabolism in *Bifidobacteria*.  
575 *Genes Nutr* 6:285–306.
- 576 60. de Vries W, Stouthamer AH. 1967. Pathway of glucose fermentation in relation to the taxonomy of  
577 *bifidobacteria*. *J Bacteriol* 93:574–576.
- 578 61. Zhang S, Dogan B, Guo C, Herlekar D, Stewart K, Scherl EJ, Simpson KW. 2020. Short Chain Fatty  
579 Acids Modulate the Growth and Virulence of Pathosymbiont *Escherichia coli* and Host Response. 8.  
580 *Antibiotics* 9:462.
- 581 62. D'Argenio G, Mazzacca G. 1999. Short-chain fatty acid in the human colon. Relation to inflammatory  
582 bowel diseases and colon cancer. *Adv Exp Med Biol* 472:149–158.
- 583 63. Ramos-Morales F, Prieto AI, Beuzón CR, Holden DW, Casadesús J. 2003. Role for *Salmonella*  
584 *enterica* Enterobacterial Common Antigen in Bile Resistance and Virulence. *J Bacteriol* 185:5328–  
585 5332.

- 586 64. Nichols RJ, Sen S, Choo YJ, Beltrao P, Zietek M, Chaba R, Lee S, Kazmierczak KM, Lee KJ, Wong  
587 A, Shales M, Lovett S, Winkler ME, Krogan NJ, Typas A, Gross CA. 2011. Phenotypic Landscape of  
588 a Bacterial Cell. *Cell* 144:143–156.
- 589 65. Rai AK, Mitchell AM. Enterobacterial Common Antigen: Synthesis and Function of an Enigmatic  
590 Molecule. *mBio* 11:e01914-20.
- 591 66. Sato Y, Atarashi K, Plichta DR, Arai Y, Sasajima S, Kearney SM, Suda W, Takeshita K, Sasaki T,  
592 Okamoto S, Skelly AN, Okamura Y, Vlamakis H, Li Y, Tanoue T, Takei H, Nittono H, Narushima S,  
593 Irie J, Itoh H, Moriya K, Sugiura Y, Suematsu M, Moritoki N, Shibata S, Littman DR, Fischbach MA,  
594 Uwamino Y, Inoue T, Honda A, Hattori M, Murai T, Xavier RJ, Hirose N, Honda K. 2021. Novel bile  
595 acid biosynthetic pathways are enriched in the microbiome of centenarians. *Nature* 1–10.
- 596 67. Ferla MP, Patrick WMY 2014. Bacterial methionine biosynthesis. *Microbiology* 160:1571–1584.
- 597 68. Barton LL, Ritz NL, Fauque GD, Lin HC. 2017. Sulfur Cycling and the Intestinal Microbiome. *Dig Dis*  
598 *Sci* 62:2241–2257.
- 599 69. Blachier F, Beaumont M, Kim E. 2019. Cysteine-derived hydrogen sulfide and gut health: a matter of  
600 endogenous or bacterial origin. *Curr Opin Clin Nutr Metab Care* 22:68–75.
- 601 70. Wallace JL, Motta J-P, Buret AG. 2018. Hydrogen sulfide: an agent of stability at the microbiome-  
602 mucosa interface. *Am J Physiol Gastrointest Liver Physiol* 314:G143–G149.
- 603 71. La Rosa SL, Leth ML, Michalak L, Hansen ME, Pudlo NA, Glowacki R, Pereira G, Workman CT,  
604 Arntzen MØ, Pope PB, Martens EC, Hachem MA, Westereng B. 2019. The human gut Firmicute  
605 *Roseburia intestinalis* is a primary degrader of dietary  $\beta$ -mannans. *Nat Commun* 10:905.
- 606 72. Murugesan S, Nirmalkar K, Hoyo-Vadillo C, García-Espitia M, Ramírez-Sánchez D, García-Mena J.  
607 2018. Gut microbiome production of short-chain fatty acids and obesity in children. *Eur J Clin*  
608 *Microbiol Infect Dis* 37:621–625.
- 609 73. Nagpal R, Neth BJ, Wang S, Craft S, Yadav H. 2019. Modified Mediterranean-ketogenic diet  
610 modulates gut microbiome and short-chain fatty acids in association with Alzheimer’s disease  
611 markers in subjects with mild cognitive impairment. *EBioMedicine* 47:529–542.
- 612 74. Chambers ES, Preston T, Frost G, Morrison DJ. 2018. Role of Gut Microbiota-Generated Short-  
613 Chain Fatty Acids in Metabolic and Cardiovascular Health. *Curr Nutr Rep* 7:198–206.
- 614 75. Eshak ES, Arafa AE. 2018. Thiamine deficiency and cardiovascular disorders. *Nutr Metab*  
615 *Cardiovasc Dis* 28:965–972.

- 616 76. Whitfield KC, Bourassa MW, Adamolekun B, Bergeron G, Bettendorff L, Brown KH, Cox L,  
617 Fattal-Valevski A, Fischer PR, Frank EL, Hiffler L, Hlaing LM, Jefferds ME, Kapner H, Kounnavong S,  
618 Mousavi MPS, Roth DE, Tsaloglou M, Wieringa F, Combs GF. 2018. Thiamine deficiency disorders:  
619 diagnosis, prevalence, and a roadmap for global control programs. *Ann N Y Acad Sci* 1430:3–43.
- 620 77. Jayasimhan S, Yap N-Y, Roest Y, Rajandram R, Chin K-F. 2013. Efficacy of microbial cell  
621 preparation in improving chronic constipation: A randomized, double-blind, placebo-controlled trial.  
622 *Clin Nutr* 32:928–934.
- 623 78. Zhang C, Jiang J, Tian F, Zhao J, Zhang H, Zhai Q, Chen W. 2020. Meta-analysis of randomized  
624 controlled trials of the effects of probiotics on functional constipation in adults. *Clin Nutr* 39:2960–  
625 2969.
- 626 79. Azagra-Boronat I, Massot-Cladera M, Knipping K, Garssen J, Ben Amor K, Knol J, Franch À, Castell  
627 M, Rodríguez-Lagunas MJ, Pérez-Cano FJ. 2020. Strain-Specific Probiotic Properties of  
628 Bifidobacteria and Lactobacilli for the Prevention of Diarrhea Caused by Rotavirus in a Preclinical  
629 Model. 2. *Nutrients* 12:498.
- 630 80. Yang B, Huang Z, He Z, Yue Y, Zhou Y, Ross RP, Stanton C, Zhang H, Zhao J, Chen W. 2021.  
631 Protective effect of Bifidobacterium bifidum FSDJN7O5 and Bifidobacterium breve FHNQ23M3 on  
632 diarrhea caused by enterotoxigenic Escherichia coli. *Food Funct*  
633 <https://doi.org/10.1039/D1FO00504A>.
- 634 81. Basu S, Paul DK, Ganguly S, Chatterjee M, Chandra PK. 2009. Efficacy of High-dose Lactobacillus  
635 rhamnosus GG in Controlling Acute Watery Diarrhea in Indian Children: A Randomized Controlled  
636 Trial. *J Clin Gastroenterol* 43:208–213.
- 637 82. Rosenfeldt V, Michaelsen KF, Jakobsen M, Larsen CN, Møller PL, Pedersen P, Tvede M, Weyrehter  
638 H, Valerius NH, Pærregaard A. 2002. Effect of probiotic Lactobacillus strains in young children  
639 hospitalized with acute diarrhea. *Pediatr Infect Dis J* 21:411–416.
- 640 83. Rosenfeldt V, Michaelsen KF, Jakobsen M, Larsen CN, Møller PL, Tvede M, Weyrehter H, Valerius  
641 NH, Pærregaard A. 2002. Effect of probiotic Lactobacillus strains on acute diarrhea in a cohort of  
642 nonhospitalized children attending day-care centers. *Pediatr Infect Dis J* 21:417–419.
- 643 84. Pant N, Marcotte H, Brüssow H, Svensson L, Hammarström L. 2007. Effective prophylaxis against  
644 rotavirus diarrhea using a combination of Lactobacillus rhamnosus GG and antibodies. *BMC*  
645 *Microbiol* 7:86.

- 646 85. Alander M, Mättö J, Kneifel W, Johansson M, Kögler B, Crittenden R, Mattila-Sandholm T, Saarela  
647 M. 2001. Effect of galacto-oligosaccharide supplementation on human faecal microflora and on  
648 survival and persistence of *Bifidobacterium lactis* Bb-12 in the gastrointestinal tract. *Int Dairy J*  
649 11:817–825.
- 650 86. Charbonneau D, Gibb RD, Quigley EMM. 2013. Fecal excretion of *Bifidobacterium infantis* 35624 and  
651 changes in fecal microbiota after eight weeks of oral supplementation with encapsulated probiotic.  
652 *Gut Microbes* 4:201–211.
- 653 87. Rattanaprasert M, Roos S, Hutkins RW, Walter J. 2014. Quantitative evaluation of synbiotic  
654 strategies to improve persistence and metabolic activity of *Lactobacillus reuteri* DSM 17938 in the  
655 human gastrointestinal tract. *J Funct Foods* 10:85–94.
- 656 88. Falony G, Vlachou A, Verbrugghe K, Vuyst LD. 2006. Cross-Feeding between *Bifidobacterium*  
657 *longum* BB536 and Acetate-Converting, Butyrate-Producing Colon Bacteria during Growth on  
658 Oligofructose. *Appl Environ Microbiol* 72:7835–7841.
- 659 89. Rivière A, Gagnon M, Weckx S, Roy D, De Vuyst L. 2015. Mutual Cross-Feeding Interactions  
660 between *Bifidobacterium longum* subsp. *longum* NCC2705 and *Eubacterium rectale* ATCC 33656  
661 Explain the Bifidogenic and Butyrogenic Effects of Arabinoxylan Oligosaccharides. *Appl Environ*  
662 *Microbiol* 81:7767–7781.
- 663 90. Drossman DA. 2016. Functional Gastrointestinal Disorders: History, Pathophysiology, Clinical  
664 Features, and Rome IV. *Gastroenterology* 150:1262-1279.e2.
- 665 91. Schmulson MJ, Drossman DA. 2017. What Is New in Rome IV. *J Neurogastroenterol Motil* 23:151–  
666 163.
- 667 92. Vazquez–Roque MI, Camilleri M, Smyrk T, Murray JA, Marietta E, O’Neill J, Carlson P, Lamsam J,  
668 Janzow D, Eckert D, Burton D, Zinsmeister AR. 2013. A Controlled Trial of Gluten-Free Diet in  
669 Patients With Irritable Bowel Syndrome-Diarrhea: Effects on Bowel Frequency and Intestinal  
670 Function. *Gastroenterology* 144:903-911.e3.
- 671 93. Krieger-Grübel C, Hutter S, Hiestand M, Brenner I, Güsewell S, Borovicka J. 2020. Treatment  
672 efficacy of a low FODMAP diet compared to a low lactose diet in IBS patients: A randomized, cross-  
673 over designed study. *Clin Nutr ESPEN* 40:83–89.
- 674 94. Patcharatrakul T, Juntrapirat A, Lakananurak N, Gonlachanvit S. 2019. Effect of Structural Individual  
675 Low-FODMAP Dietary Advice vs. Brief Advice on a Commonly Recommended Diet on IBS  
676 Symptoms and Intestinal Gas Production. *Nutrients* 11:2856.

- 677 95. Kanemura A, Lipowski G, Komine H, Akaho S. 2015. Automatic Categorization of Health Indices for  
678 Risk Quantification. *Procedia Comput Sci* 63:325–331.
- 679 96. Beghini F, McIver LJ, Blanco-Míguez A, Dubois L, Asnicar F, Maharjan S, Mailyan A, Manghi P,  
680 Scholz M, Thomas AM, Valles-Colomer M, Weingart G, Zhang Y, Zolfo M, Huttenhower C, Franzosa  
681 EA, Segata N. 2021. Integrating taxonomic, functional, and strain-level profiling of diverse microbial  
682 communities with bioBakery 3. *eLife* 10:e65088.
- 683 97. Jari Oksanen, F. Guillaume Blanchet, Michael Friendly, Roeland Kindt, Pierre Legendre, Dan  
684 McGlenn, Peter R. Minchin, R. B. O’Hara, Gavin L. Simpson, Peter Solymos, M. Henry H. Stevens,  
685 Eduard Szoecs, Helene Wagner. 2018. *vegan: Community Ecology Package*.
- 686 98. Mallick H, Rahnavard A, McIver LJ, Ma S, Zhang Y, Nguyen LH, Tickle TL, Weingart G, Ren B,  
687 Schwager EH, Chatterjee S, Thompson KN, Wilkinson JE, Subramanian A, Lu Y, Waldron L, Paulson  
688 JN, Franzosa EA, Bravo HC, Huttenhower C. 2021. Multivariable Association Discovery in  
689 Population-scale Meta-omics Studies.

690 **Tables**

691

692 **Table 1.** Subject demographics. “Healthy” controls are self-reported as healthy subjects with no existing  
693 comorbidities. Subjects with IBS are also self-reported. The subtype designation is based on the subject  
694 symptoms. For the alternating designation, subjects experienced symptoms of constipation and diarrhea.  
695 Cohort populations are further classified by gender. Average and standard deviation of age groups are  
696 listed next to each population.

697

| Phenotype            | Subjects | Female (Age ± SD) | Male (Age ± SD)  | Unspecified (Age ± SD) |
|----------------------|----------|-------------------|------------------|------------------------|
| <b>Healthy</b>       | 122      | 54 (44 ± 13)      | 52 (44 ± 12.6)   | 16 (41.9 ± 9.2)        |
| <b>IBS (Total)</b>   | 490      | 302 (46.5 ± 15.5) | 158(41.6 ± 15.3) | 31(43.3 ± 16.9)        |
| IBS-C (Constipation) | 185      | 126 (45.5 ± 14.9) | 50 (37.4 ± 13.5) | 9 (41.7 ± 13.1)        |
| IBS-D (Diarrhea)     | 86       | 50 (41.9 ± 14.5)  | 32 (44.3 ± 16.5) | 4 (40.7 ± 12.1)        |
| IBS-A (Alternating)  | 88       | 58 (45.4 ± 15.6)  | 26 (37.6 ± 12.4) | 4 (41.5 ± 14)          |
| IBS-U (Unspecified)  | 131      | 64 (53.6 ± 15.6)  | 49 (46.5 ± 16.3) | 18 (45.6 ± 21.5)       |

698

699

700 **Figure Legends**

701

702 **Figure 1.** Microbiome profiles of the healthy and IBS cohorts. A) Principal coordinates analysis based on  
703 the Bray-Curtis dissimilarity distance matrix of the IBS and healthy microbiomes. B) Boxplot of the

704 microbiome distributions along the PCO1 axis. An unpaired t-test was computed. C) A random forest was  
705 employed to differentiate microbes between healthy and IBS subtypes. The density of microbes selected  
706 from random forest correspond to the sample distribution along PCO1 axis. D) Alpha diversity between  
707 healthy and each IBS subtype cohort. The Shannon index, species richness, and evenness were  
708 calculated. Unpaired t-tests were conducted, and p-values were adjusted with Benjamin-Hochberg false  
709 discovery rate (FDR) for multiple comparisons. \*  $p < 0.05$ , \*\*  $p < 0.01$ , \*\*\*  $p < 0.001$ , \*\*\*\*  $p < 0.0001$ .

710

711 **Figure 2.** Microbes and pathways that differentiate healthy and IBS cohorts. A) Relative abundances of  
712 the microbes associated with healthy and IBS populations. A random forest was used to determine  
713 microbes that contribute to differentiating healthy and IBS. The relative abundances of a subset of the  
714 microbes were plotted for healthy and each IBS subtype. T-test were calculated. P values were adjusted  
715 for multiple comparisons testing by false discovery rate corrections. Non-significant comparisons were  
716 omitted. B) Functional pathways associated with healthy and IBS gut microbiomes. Multivariate linear  
717 association testing with Maaslin2 was used to determine pathways associated with IBS relative to the  
718 healthy control population. Values indicate the beta coefficient from linear association testing. Pathways  
719 listed were filtered based on q value  $< 0.1$  and beta coefficients  $> 0.2$  or  $< -0.2$ . \*  $p < 0.05$ , \*\*  $p < 0.01$ , \*\*\*  
720  $p < 0.001$ , \*\*\*\*  $p < 0.0001$ .

721

722 **Figure 3.** Longitudinal microbiome diversity and relative abundances of probiotics in subjects with IBS. A)  
723 Shannon index of the microbiome composition from subjects with timepoints 1 – 3. B) Bray-Curtis  
724 similarity of timepoints within each individual. Each timepoint is compared to each subsequent timepoint.  
725 C) The overall microbiome score across timepoints 1 – 3. Wilcoxon tests were computed with FDR  
726 adjusted p values. D) Relative abundances of probiotic species in subjects across 3 timepoints. T-tests  
727 were computed with FDR adjusted p values. \* p value  $< 0.05$ , \*\* p value  $< 0.01$ , \*\*\* p value  $< 0.001$ .

728

Status ● Healthy ● IBS

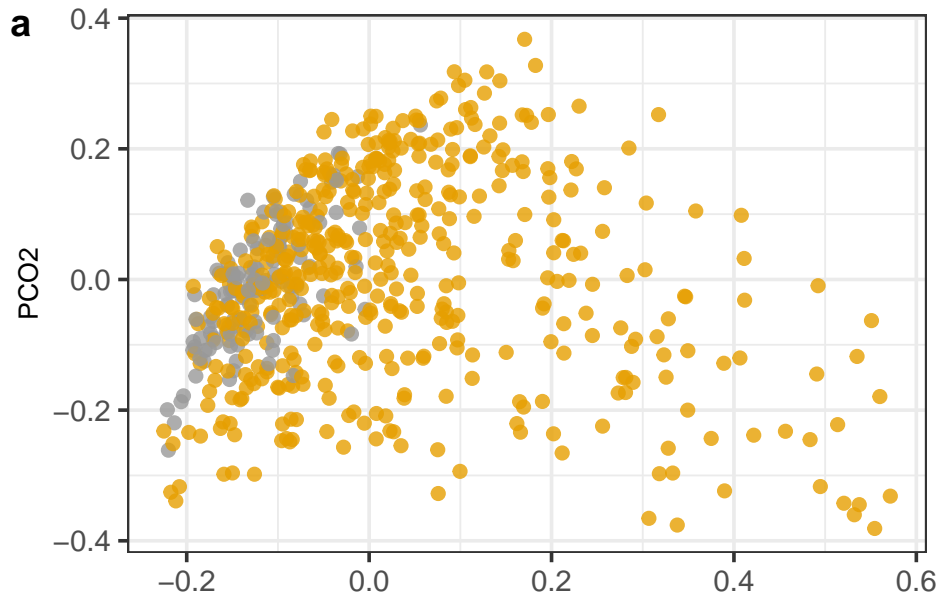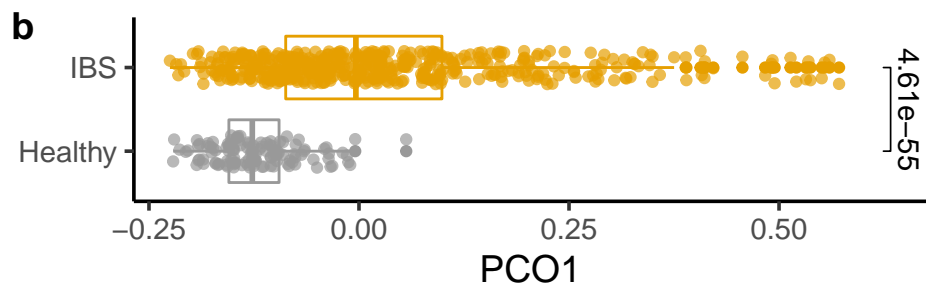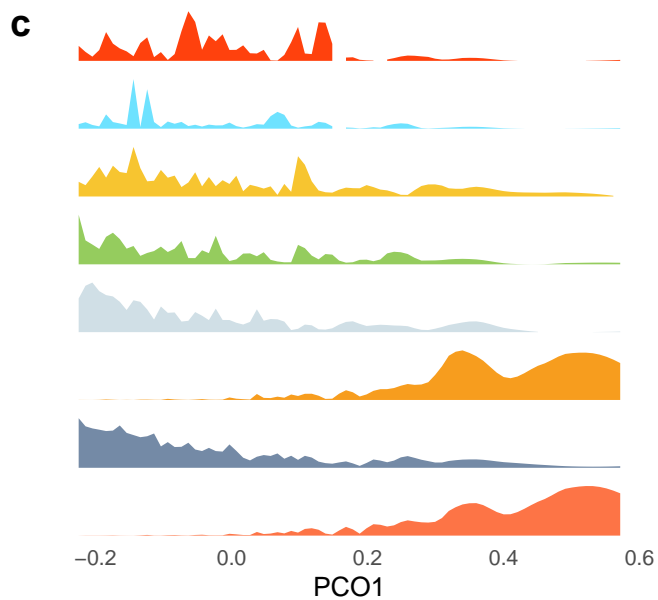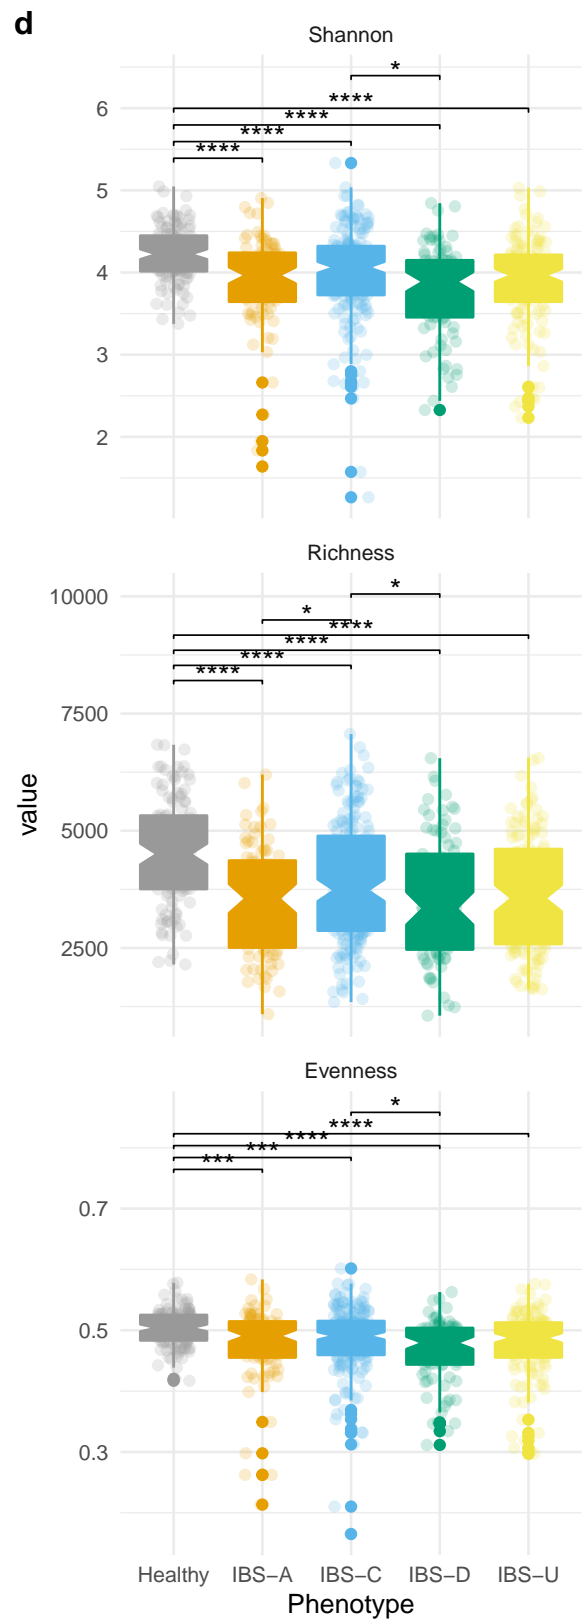

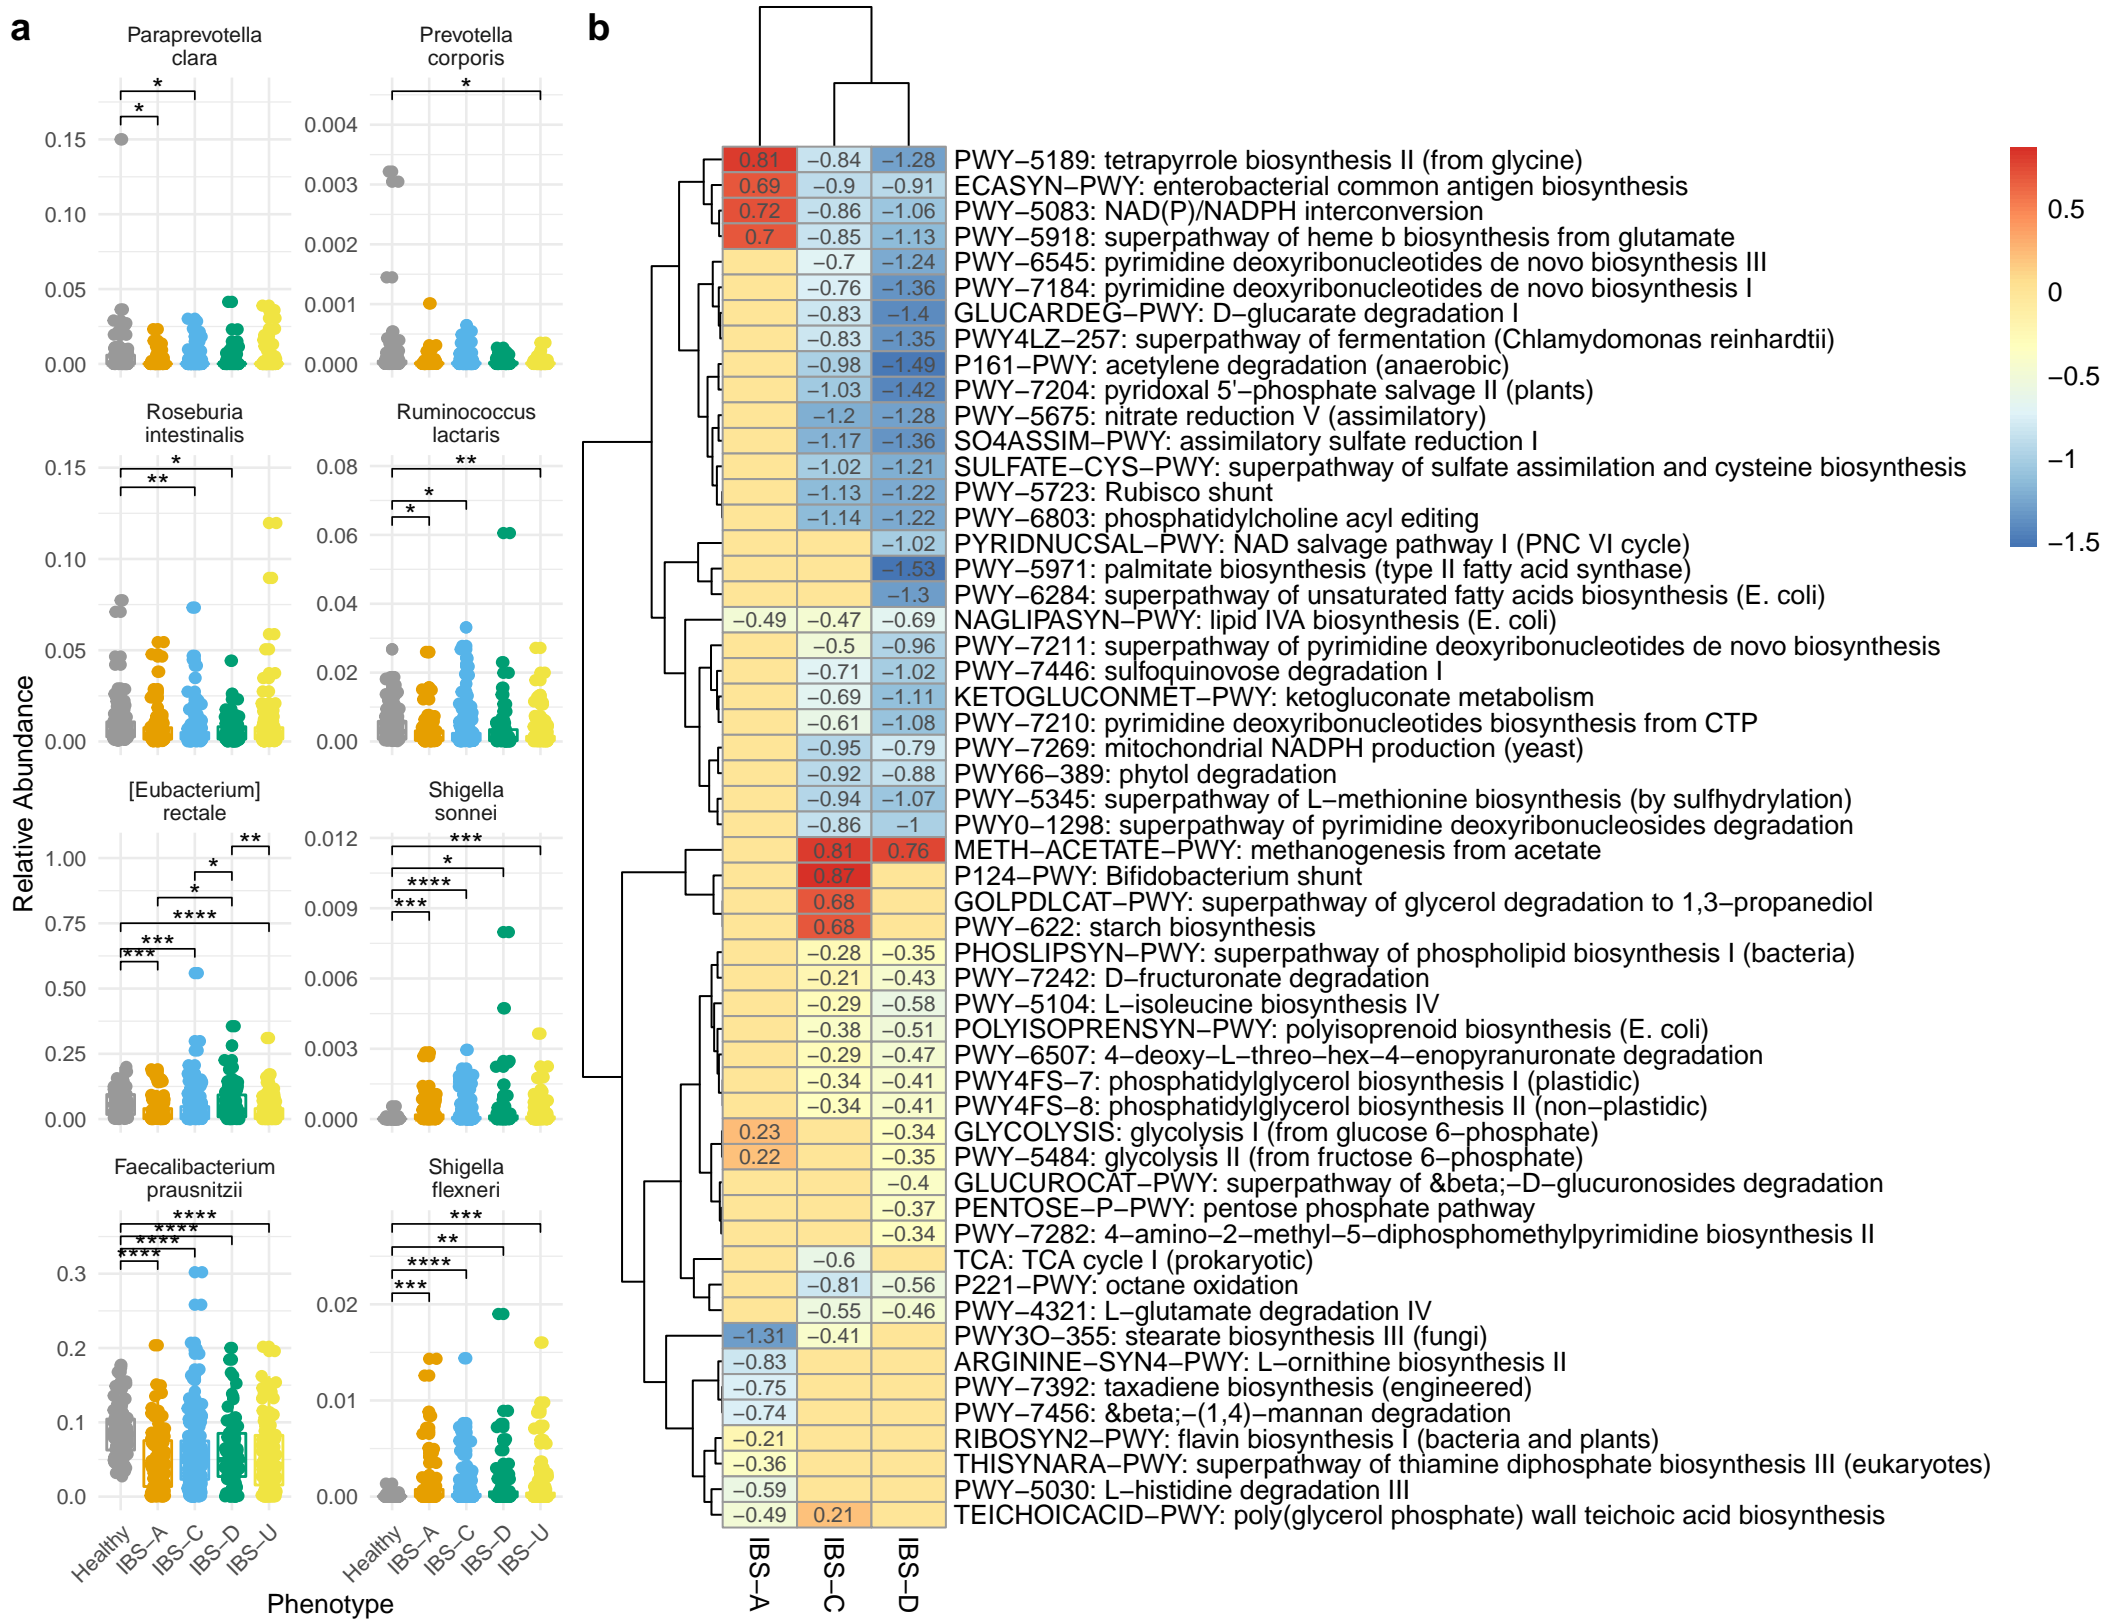



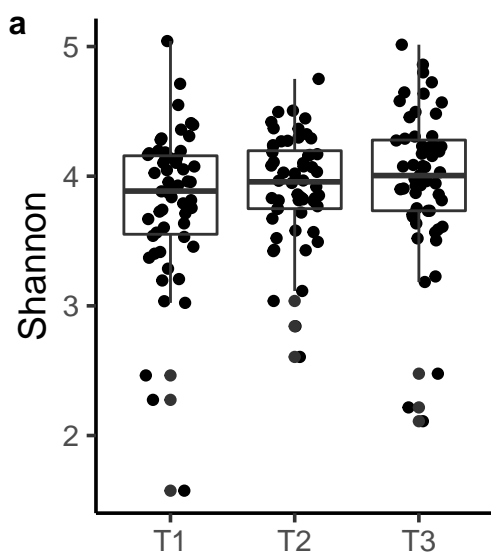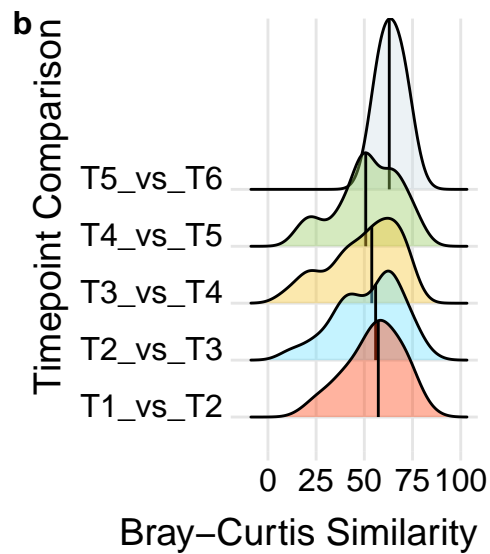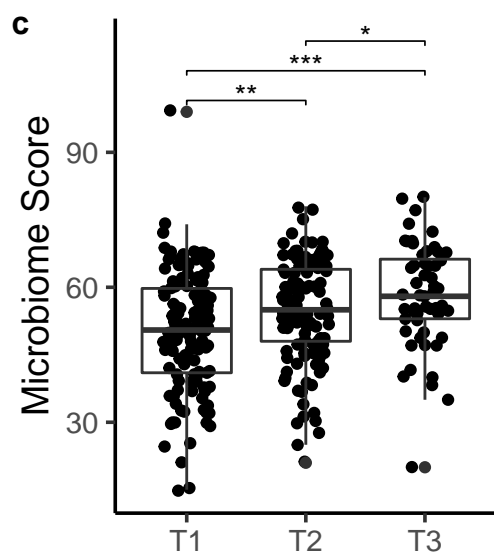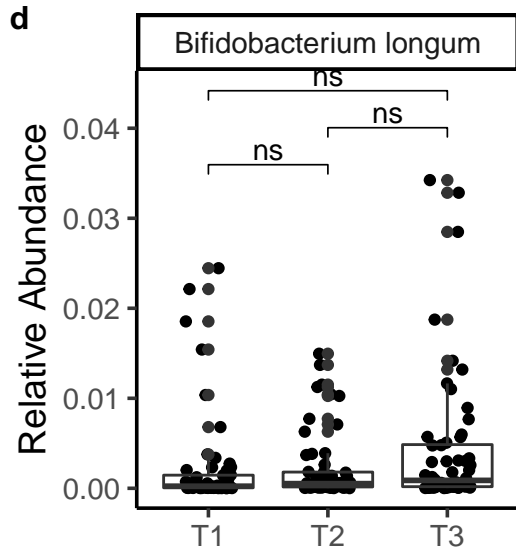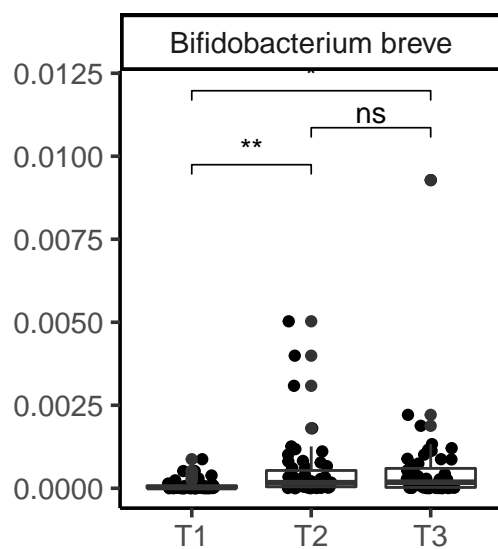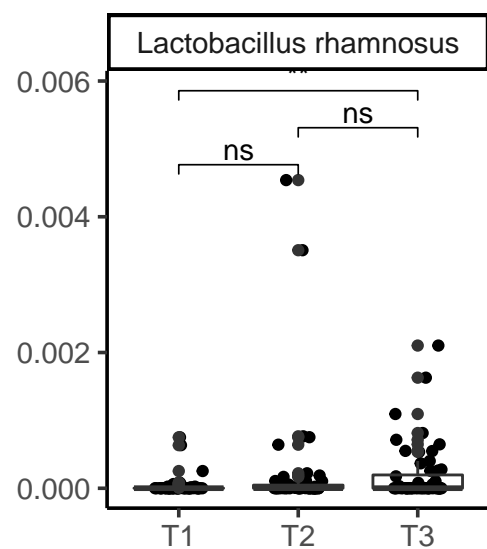

Source: http://biorxiv.org/content/10.1101/2021.09.02.458777v1.full.pdf
